# Supplementary material for: Irissometry: Effects of Pupil Size on Iris Elasticity Measured With Video-Based Feature Tracking
Source: PubMed Central journal article supplement — Invest Ophthalmol Vis Sci. 2022 Feb 10;63(2):20. doi: 10.1167/iovs.63.2.20 (PMC8842542; doi:10.1167/iovs.63.2.20), 2022-02-10
Supplement: iovs-63-2-20_s003.pdf [file iovs-63-2-20_s003.pdf]

## Supplementary materials

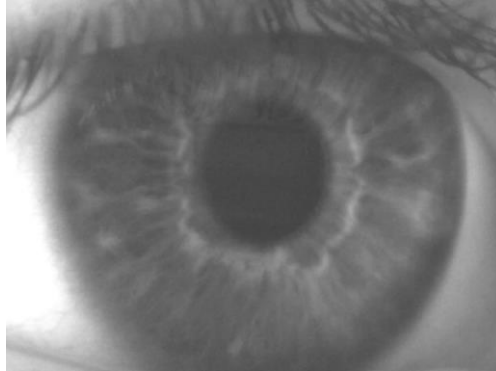

**Supplementary Video S1.** Recording of iris and pupil during on- and off-set of sound stimulus.

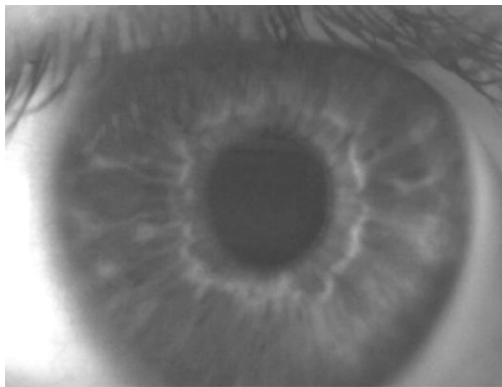

**Supplementary Video S2.** Recording of iris and pupil during on- and off-set of light stimulus.

**Supplementary Table S1.** Results of post-hoc t-test comparisons on relative pupil size compared to baseline at  $t = 0$ s per sound and light stimulation across time after stimulus onset.

The  $p$ -values correspond to the significance symbols in the main article's Fig. 2.

| <i>Time from stimulus onset</i> | <b>Sound</b><br>( <i>t-value, p-value</i> ) | <b>Light</b><br>( <i>t-value, p-value</i> ) |
|---------------------------------|---------------------------------------------|---------------------------------------------|
| 1s                              | 7.55, <0.001                                | 1.42, 0.170                                 |
| 2s                              | 7.24, <0.001                                | 5.19, <0.001                                |
| 3s                              | 6.38, <0.001                                | 4.41, <0.001                                |
| 4s                              | 6.22, <0.001                                | 4.46, <0.001                                |
| 5s                              | 7.15, <0.001                                | 4.92, <0.001                                |
| 6s                              | 3.44, 0.002                                 | 7.15, <0.001                                |
| 7s                              | 0.84, 0.408                                 | 6.27, <0.001                                |
| 8s                              | 5.71, <0.001                                | 4.70, <0.001                                |
| 9s                              | 4.71, <0.001                                | 3.07, 0.006                                 |
| 10s                             | 6.49, <0.001                                | 1.46, 0.159                                 |

**Supplementary Table S2.** Results of post-hoc t-test comparisons on feature spacing between a dilated and constricted pupil state per sound and light stimulation across annulus eccentricities. The  $p$ -values correspond to the significance symbols in the main article's Fig. 3c.

| <b>Annulus eccentricity</b> | <b>Sound</b><br>( <i>t-value, p-value</i> ) | <b>Light</b><br>( <i>t-value, p-value</i> ) |
|-----------------------------|---------------------------------------------|---------------------------------------------|
| 5%                          | 7.68, <0.001                                | 11.64, <0.001                               |
| 15%                         | 5.92, <0.001                                | 6.48, <0.001                                |
| 25%                         | 4.60, <0.001                                | 5.54, <0.001                                |
| 35%                         | 8.09, <0.001                                | 4.02, 0.001                                 |
| 45%                         | 3.31, 0.006                                 | 4.37, <0.001                                |
| 55%                         | 1.88, 0.082                                 | 3.36, 0.004                                 |
| 65%                         | 4.47, <0.001                                | 2.13, 0.049                                 |
| 75%                         | 3.27, 0.006                                 | 4.24, <0.001                                |
| 85%                         | 3.04, 0.010                                 | 3.66, 0.002                                 |
| 95%                         | 0.23, 0.820                                 | 2.16, 0.047                                 |

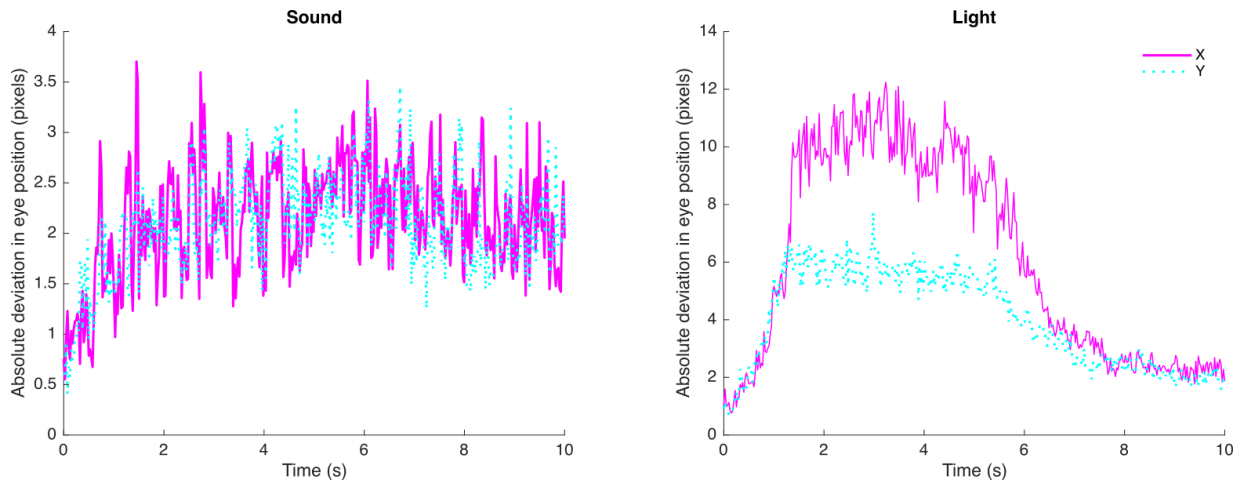

**Supplementary Figure S1.** Deviation of horizontal (x; solid) and vertical (y; dotted) eye position signal in pixels based on pupil border across time during a pupil response evoked by a sound (left) or light (right) onset.

**Supplementary Table S3.** Results of post-hoc t-test comparisons on standard deviations of eye position (X = horizontal, Y = vertical) traces during pupil responses between feature locations.

| <b>Feature location</b> | <b>Inner iris – X<br/>(<i>t</i>-value, <i>p</i>-value)</b> | <b>Pupil border - X<br/>(<i>t</i>-value, <i>p</i>-value)</b> |
|-------------------------|------------------------------------------------------------|--------------------------------------------------------------|
| <b>Outer iris - X</b>   | 2.36, 0.027                                                | 0.02, 0.987                                                  |
| <b>Inner iris - X</b>   |                                                            | 2.34, 0.029                                                  |
|                         | <b>Inner iris – Y<br/>(<i>t</i>-value, <i>p</i>-value)</b> | <b>Pupil border – Y<br/>(<i>t</i>-value, <i>p</i>-value)</b> |
| <b>Outer iris - Y</b>   | 1.62, 0.120                                                | 2.91, 0.008                                                  |
| <b>Inner iris - Y</b>   |                                                            | 1.98, 0.061                                                  |
